# Supplementary material for: Histological chorioamnionitis is associated with an increased risk of wheezing in preterm children less than 34 gestational weeks
Source: BMC Pediatr. 2021 Mar 1;21:104. doi: 10.1186/s12887-021-02572-9 (PMC7919088; doi:10.1186/s12887-021-02572-9)
Supplement: Supplementary file 2 — Additional file 2: Table S2. All differential metabolites identified in the serum of preterm children exposed to histological chorioamnionitis. [file 12887_2021_2572_MOESM2_ESM.xlsx]

## Sheet: HCA vs Con
ID	m/z	Retention time (min)	Ion mode	Metabolites	Compound ID	Super Class	Class	Sub Class	Adducts	Formula	Score	Fragmentation Score	Mass Error (ppm)	VIP	P-value	adj.P-value	log2(FC)	FC	average(HCA)	average(Con)
9.38_256.2401n	255.23	9.38	neg	Myristic Acid ethyl ester	45004	Unclassified	Unclassified	Unclassified	M-H, 2M-H, M+FA-H	C16H32O2	55.4	77.9	-0.55	3.56	0.03	0.15	0.57	1.48	4015.91	2710.83
7.43_205.0854m/z	205.09	7.43	pos	Monoisobutyl phthalic acid	HMDB0002056	Benzenoids	Benzene and substituted derivatives	Benzoic acids and derivatives	M+H-H2O	C12H14O4	54.7	83	-2.33	2.02	0.01	0.05	-0.16	0.9	2226.14	2486.48
4.54_239.0925m/z	239.09	4.54	neg	CMPF	45041	Unclassified	Unclassified	Unclassified	M-H	C12H16O5	54.5	73	-0.13	4.09	0.03	0.14	-0.57	0.67	3041.14	4527.42
8.16_262.2303n	280.26	8.16	pos	5-(1-hydroxypropan-2-yl)isolongifol-5-ene	53478	Unclassified	Unclassified	Unclassified	M+H, M+NH4, M+H-H2O	C18H30O	54.5	78.2	2.45	2.85	0.01	0.08	-0.42	0.75	1442.7	1925.08
8.81_264.2453n	282.28	8.81	pos	2E,13Z-Octadecadienal	LMFA06000234	Lipids and lipid-like molecules	Fatty Acyls	Fatty aldehydes	M+H, M+NH4, M+H-H2O	C18H32O	53.6	68.4	0.06	9.36	0	0.04	-0.51	0.7	11016.7	15702.6
7.32_479.3004n	480.31	7.32	pos	PE(18:1(9Z)/0:0)	40778	Unclassified	Unclassified	Unclassified	M+H, 2M+H, M+H-H2O	C23H46NO7P	53.1	71.5	-1.71	5.61	0	0.04	0.66	1.58	5427.06	3442.86
3.78_239.0911m/z	239.09	3.78	pos	3,4-dimethyl-5-carboxyethyl-2-furanacrylic acid	LMFA01150051	Lipids and lipid-like molecules	Fatty Acyls	Fatty Acids and Conjugates	M+H	C12H14O5	52.6	65.8	-1.11	1.21	0.02	0.12	-0.76	0.59	167.35	283.15
6.20_467.2999n	468.31	6.2	pos	PE(17:0/0:0)	77696	Unclassified	Unclassified	Unclassified	M+H, M+Na, 2M+H, M+H-H2O	C22H46NO7P	52.1	65.2	-2.67	5.58	0.03	0.13	0.55	1.46	7354.01	5028.95
4.54_240.0994n	223.1	4.54	pos	2-carboxyethyl-5-furanpentanoic acid	LMFA01150056	Lipids and lipid-like molecules	Fatty Acyls	Fatty Acids and Conjugates	M+H-H2O, M+Na, M+H, 2M+Na	C12H16O5	52	62.5	-1.75	2.51	0.03	0.14	-0.62	0.65	1024.98	1575.71
6.33_309.2066m/z	309.21	6.33	neg	13(S)-HpOTrE	36052	Unclassified	Unclassified	Unclassified	M-H	C18H30O4	52	67.7	-1.65	2.27	0.01	0.08	0.54	1.46	1346.46	924.33
5.24_230.2475m/z	230.25	5.24	pos	Xestoaminol C	53933	Unclassified	Unclassified	Unclassified	M+H	C14H31NO	51.2	60.2	-1.48	1.14	0.01	0.09	0.27	1.21	622.02	515.12
7.63_554.3450m/z	554.35	7.63	neg	LysoPC(17:0)	HMDB0012108	Lipids and lipid-like molecules	Glycerophospholipids	Glycerophosphocholines	M+FA-H	C25H52NO7P	50.8	57.1	-2.61	5.04	0	0.01	0.42	1.33	5362.14	4021.47
6.57_519.3309n	520.34	6.57	pos	1-Linoleoylglycerophosphocholine	1	Lipids and lipid-like molecules	Glycerophospholipids	Glycerophosphocholines	M+H, M+Na	C26H50NO7P	50.5	58.1	-2.97	12.74	0	0	0.5	1.41	24941.2	17637.9
6.58_564.3292m/z	564.33	6.58	neg	LysoPC(18:2(9Z,12Z))	HMDB0010386	Lipids and lipid-like molecules	Glycerophospholipids	Glycerophosphocholines	M+FA-H	C26H50NO7P	50.4	55.9	-2.85	5.7	0	0.01	0.37	1.29	7313.51	5663.13
8.44_354.2768n	355.28	8.44	pos	MG(18:2(9Z,12Z)/0:0/0:0)[rac]	4252	Unclassified	Unclassified	Unclassified	M+H, M+NH4, M+H-H2O	C21H38O4	50.2	59.3	-0.72	1.61	0.02	0.12	0.57	1.49	628.48	423.17
0.49_436.3421m/z	436.34	0.49	pos	24-northornasterol A	LMST01010320	Lipids and lipid-like molecules	Sterol Lipids	Sterols	M+NH4	C26H42O4	49.9	60.5	-0.15	1.16	0	0	-0.28	0.82	282.61	342.98
6.93_540.3293m/z	540.33	6.93	neg	PE(19:0/0:0)	LMGP02050028	Lipids and lipid-like molecules	Glycerophospholipids	Glycerophosphoethanolamines	M+FA-H	C24H50NO7P	49.8	52.9	-2.88	7.19	0	0.01	0.32	1.25	12818.3	10260.2
9.38_299.2588m/z	299.26	9.38	neg	DL-2-hydroxy stearic acid	35432	Unclassified	Unclassified	Unclassified	M-H	C18H36O3	49.7	56.9	-1.35	1.31	0	0.03	0.9	1.86	252.18	135.4
13.84_719.5342m/z	719.53	13.84	neg	PE-Cer(d14:1(4E)/21:0)	LMSP03020007	Lipids and lipid-like molecules	Sphingolipids	Phosphosphingolipids	M+FA-H	C37H75N2O6P	49.4	58.9	-0.43	1.33	0	0.01	1.62	3.08	146.44	47.57
4.54_181.0855m/z	181.09	4.54	pos	5-(3E-Pentenyl)tetrahydro-2-oxo-3-furancarboxylic acid	HMDB0030991	Organoheterocyclic compounds	Lactones	Gamma butyrolactones	M+H-H2O	C10H14O4	49.2	50.1	-2.23	2.1	0.03	0.15	-0.62	0.65	712.62	1096.11
7.06_590.3448m/z	590.34	7.06	neg	PC(16:0/5:0(COOH))	LMGP20010006	Lipids and lipid-like molecules	Glycerophospholipids	Oxidized glycerophospholipids	M-H2O-H	C29H56NO10P	48.8	48.4	-2.55	3.94	0.01	0.05	0.47	1.39	3775.29	2718.69
7.35_566.3451m/z	566.35	7.35	neg	LysoPC(18:1(9Z))	HMDB0002815	Lipids and lipid-like molecules	Glycerophospholipids	Glycerophosphocholines	M+FA-H	C26H52NO7P	48.5	46.4	-2.48	6.13	0.04	0.17	0.19	1.14	30479.7	26675.4
0.36_101.0592m/z	101.06	0.36	pos	3-Hydroxy-2-methyl-[R-(R,S)]-butanoic acid	HMDB0000351	Lipids and lipid-like molecules	Fatty Acyls	Fatty acids and Conjugates	M+H-H2O	C5H10O3	48.4	53.3	-4.43	3.58	0	0	-1.24	0.42	277.89	656.17
6.94_495.3310n	496.34	6.94	pos	PC(16:0/0:0)[U] / PC(16:0/0:0)[rac]	182	Unclassified	Unclassified	Unclassified	M+H, M+Na, 2M+H, M+H-H2O	C24H50NO7P	48.4	48.4	-3.07	14.03	0	0.02	0.37	1.29	50087.5	38765.2
3.59_778.5617m/z	778.56	3.59	neg	PE(15:0/20:0)	HMDB0008899	Lipids and lipid-like molecules	Glycerophospholipids	Glycerophosphoethanolamines	M+FA-H	C40H80NO8P	48.1	56	1.89	1.7	0	0.04	-0.32	0.8	712.45	891.64
6.64_122.0960m/z	122.1	6.64	pos	1,2,3,4-Tetrahydro-6-propanoylpyridine	HMDB0034884	Organoheterocyclic compounds	Pyridines and derivatives	Hydropyridines	M+H-H2O	C8H13NO	48.1	49	-3.31	1.95	0	0	-0.3	0.81	715.4	879.16
7.38_524.3339m/z	524.33	7.38	neg	LysoPC(P-16:0)	HMDB0010407	Lipids and lipid-like molecules	Glycerophospholipids	Glycerophosphocholines	M+FA-H	C24H50NO6P	48	51.3	-3.94	1.23	0.03	0.14	0.2	1.15	1053.44	916.47
6.54_477.2848n	478.29	6.54	pos	LysoPE(0:0/18:2(9Z,12Z))	HMDB0011477	Lipids and lipid-like molecules	Glycerophospholipids	Glycerophosphoethanolamines	M+H, M+Na	C23H44NO7P	47.9	42.9	-1.6	2.7	0	0.01	0.69	1.61	935.34	580.91
1.69_199.0399n	198.03	1.69	neg	p-CHLOROPHENYLALANINE	44308	Unclassified	Unclassified	Unclassified	M-H, 2M-H	C9H10ClNO2	47.3	62.7	-0.75	2.83	0	0.01	-0.16	0.9	3664.49	4091.41
8.20_745.5493m/z	745.55	8.2	neg	PE-Cer(d14:2(4E,6E)/23:0)	LMSP03020041	Lipids and lipid-like molecules	Sphingolipids	Phosphosphingolipids	M+FA-H	C39H77N2O6P	47.1	50	-1.19	3.72	0	0	-0.68	0.62	1051.41	1689.62
6.89_614.3442m/z	614.34	6.89	neg	OHOOA-PE	LMGP20020046	Lipids and lipid-like molecules	Glycerophospholipids	Oxidized glycerophospholipids	M-H2O-H	C31H56NO10P	46.8	39.6	-3.43	1.32	0.03	0.15	0.32	1.25	755.89	603.66
8.92_122.0959m/z	122.1	8.92	pos	5-Ethyl-2-methylpyridine	HMDB0029729	Organoheterocyclic compounds	Pyridines and derivatives	Methylpyridines	M+H	C8H11N	46.7	42.2	-4.17	4.97	0	0	-0.28	0.82	4670.21	5689.62
2.84_256.0946n	255.09	2.84	neg	3-carboxy-4-methyl-5-(1-hydroxypropyl)-2-furanpropionic acid	LMFA01150060	Lipids and lipid-like molecules	Fatty Acyls	Fatty Acids and Conjugates	M-H, 2M-H	C12H16O6	46.6	34	-0.34	3.99	0.03	0.14	-0.66	0.63	2219.12	3502.37
6.90_569.3467n	570.35	6.9	pos	LysoPC(22:5(4Z,7Z,10Z,13Z,16Z))	61711	Unclassified	Unclassified	Unclassified	M+H, M+Na	C30H52NO7P	46.4	36.4	-2.61	2.87	0.02	0.1	0.44	1.36	2424.26	1785.32
6.70_501.2848n	502.29	6.7	pos	LysoPE(0:0/20:4(8Z,11Z,14Z,17Z))	HMDB0011488	Lipids and lipid-like molecules	Glycerophospholipids	Glycerophosphoethanolamines	M+H-H2O, M+H	C25H44NO7P	46.3	34.9	-1.45	3.36	0.03	0.14	0.32	1.25	4319.35	3468.09
8.10_481.3159n	482.32	8.1	pos	PE(18:0/0:0)	40775	Unclassified	Unclassified	Unclassified	M+H, 2M+H, M+H-H2O	C23H48NO7P	46.3	38.1	-2.03	2.55	0.02	0.12	0.32	1.25	2524.95	2025.89
7.57_552.3653m/z	552.37	7.57	neg	LysoPC(P-18:0)	HMDB0013122	Lipids and lipid-like molecules	Glycerophospholipids	Glycerophosphocholines	M+FA-H	C26H54NO6P	46	39.4	-3.5	1.24	0.03	0.16	0.28	1.21	965.48	797.87
5.89_460.2685m/z	460.27	5.89	pos	Pectachol	HMDB0039064	Phenylpropanoids and polyketides	Coumarins and derivatives	Unclassified	M+NH4	C26H34O6	45.9	32.7	-1.91	5.09	0	0	-0.63	0.64	1667.83	2586.11
6.70_477.2848n	478.29	6.7	pos	LysoPE(18:2(9Z,12Z)/0:0)	62292	Lipids and lipid-like molecules	Glycerophospholipids	Glycerophosphoethanolamines	M+H, M+Na, 2M+H, M+H-H2O	C23H44NO7P	45.9	32.3	-1.57	7.48	0	0.01	0.58	1.5	8165.49	5456.54
8.08_701.5579m/z	701.56	8.08	pos	PE-Cer(d15:1(4E)/22:0(2OH))	LMSP03020075	Lipids and lipid-like molecules	Sphingolipids	Phosphosphingolipids	M+H-H2O	C39H79N2O7P	45.9	42.6	-1.83	7.66	0.02	0.12	-0.37	0.77	16900.3	21853.1
2.84_211.0975m/z	211.1	2.84	neg	3,4-Methyleneazelaic acid	HMDB0059744	Lipids and lipid-like molecules	Fatty Acyls	Fatty acids and Conjugates	M-H	C11H16O4	45.8	31.7	-0.22	1.49	0.03	0.13	-0.7	0.61	280.42	456.63
7.10_453.2849n	454.29	7.1	pos	PE(16:0/0:0)	40776	Unclassified	Unclassified	Unclassified	M+H, M+Na, 2M+H, M+H-H2O	C21H44NO7P	45.8	32.3	-1.33	3.73	0	0.04	0.53	1.45	3002.84	2077.92
7.39_279.1589m/z	279.16	7.39	pos	2-[(3,3-dimethyloxiran-2-yl)methyl]-4-(3-methylbut-2-en-1-yl)benzene-1,3,5-triol	HMDB0133048	Benzenoids	Phenols	Benzenetriols and derivatives	M+H	C16H22O4	45.8	36.2	-0.76	3.09	0	0	-0.22	0.86	2705.56	3155.2
6.24_562.3135m/z	562.31	6.24	neg	LysoPC(18:3(6Z,9Z,12Z))	HMDB0010387	Lipids and lipid-like molecules	Glycerophospholipids	Glycerophosphocholines	M+FA-H	C26H48NO7P	45.7	32.1	-2.94	3.12	0	0	0.67	1.59	1415.06	891.55
3.52_333.1443m/z	333.14	3.52	pos	Citpressine II	HMDB0029324	Organoheterocyclic compounds	Quinolines and derivatives	Benzoquinolines	M+NH4	C17H17NO5	45.4	30	-0.47	1.21	0.02	0.11	-0.47	0.72	252.2	348.98
7.40_572.3699m/z	572.37	7.4	pos	LysoPC(22:4(7Z,10Z,13Z,16Z))	61710	Lipids and lipid-like molecules	Glycerophospholipids	Glycerophosphocholines	M+H	C30H54NO7P	45.4	35.5	-2.03	2.47	0	0.01	0.57	1.48	1022.83	689.14
6.69_500.2769m/z	500.28	6.69	neg	LysoPE(0:0/20:4(5Z,8Z,11Z,14Z))	HMDB0011487	Lipids and lipid-like molecules	Glycerophospholipids	Glycerophosphoethanolamines	M-H	C25H44NO7P	45.2	30.7	-2.75	3.2	0	0.04	0.33	1.26	3050.93	2422.64
7.06_545.3468n	546.35	7.06	pos	LysoPC(20:3(5Z,8Z,11Z))	HMDB0010393	Lipids and lipid-like molecules	Glycerophospholipids	Glycerophosphocholines	M+H, M+Na	C28H52NO7P	45.2	30.3	-2.5	8.81	0	0.02	0.57	1.49	14136.7	9513.34
7.69_435.2492m/z	435.25	7.69	pos	PA(18:2(9Z,12Z)/0:0)	82336	Unclassified	Unclassified	Unclassified	M+H	C21H39O7P	45	46.7	-3.26	1.23	0	0	1.62	3.08	100.67	32.7
8.13_523.3616n	524.37	8.13	pos	LysoPC(18:0)	HMDB0010384	Lipids and lipid-like molecules	Glycerophospholipids	Glycerophosphocholines	M+H, M+Na, M+H-H2O	C26H54NO7P	44.5	31	-4.24	15.98	0.03	0.13	0.22	1.16	143186	122951
3.89_857.6717m/z	857.67	3.89	neg	SM(d18:2/24:0)	LMSP03010081	Lipids and lipid-like molecules	Sphingolipids	Phosphosphingolipids	M+FA-H	C47H93N2O6P	44.4	33	-4.41	4.12	0	0.02	-0.42	0.75	2623.77	3508.66
6.69_600.2021m/z	600.2	6.69	neg	2-amino-4-({1-[(carboxymethyl)-C-hydroxycarbonimidoyl]-2-[(2-{3,5-dihydroxy-4-[(1E)-3-methylbut-1-en-1-yl]phenyl}-2-hydroxy-1-(4-hydroxyphenyl)ethyl)sulfanyl]ethyl}-C-hydroxycarbonimidoyl)butanoic acid	HMDB0129016	Organic acids and derivatives	Carboxylic acids and derivatives	Amino acids, peptides, and analogues	M-H2O-H	C29H37N3O10S	44.3	26.2	-0.05	1.35	0	0	0.75	1.68	216.53	128.63
9.37_465.3569m/z	465.36	9.37	neg	5beta-Cholestane-3alpha,7alpha,24-triol	HMDB0062418	Lipids and lipid-like molecules	Steroids and steroid derivatives	Bile acids, alcohols and derivatives	M+FA-H	C27H48O3	44.3	45.3	-3.98	2	0	0	1.02	2.03	313.11	153.96
5.74_529.2072m/z	529.21	5.74	pos	Physalin O	93687	Lipids and lipid-like molecules	Steroids and steroid derivatives	Physalins and derivatives	M+H	C28H32O10	44.2	29.6	0.8	1.05	0.02	0.1	-0.61	0.66	132.88	202.59
6.66_481.3159n	482.32	6.66	pos	LysoPC(15:0)	61691	Lipids and lipid-like molecules	Glycerophospholipids	Glycerophosphocholines	M+H, 2M+H	C23H48NO7P	44.2	24.2	-1.86	3.02	0.03	0.16	0.36	1.28	3148.91	2453.04
0.30_119.0856m/z	119.09	0.3	pos	Nona-2,4,6-trienal	HMDB0032441	Organooxygen compounds	Carbonyl compounds	Aldehydes	M+H-H2O	C9H12O	44	30.5	0.73	1	0	0	-0.3	0.81	164.69	202.24
2.60_154.0990n	172.13	2.6	pos	6-nonynoic acid	LMFA01030507	Lipids and lipid-like molecules	Fatty Acyls	Fatty Acids and Conjugates	M+H, M+NH4	C9H14O2	44	31.3	-2.41	1.2	0	0	-0.88	0.54	65.65	121.1
9.24_467.3726m/z	467.37	9.24	neg	(5Z,9Z)-2-methoxy-hexacosadienoic acid	LMFA01080023	Lipids and lipid-like molecules	Fatty Acyls	Fatty Acids and Conjugates	M+FA-H	C27H50O3	43.7	27.3	-3.78	3.37	0	0	0.45	1.37	1960.09	1434.23
7.43_149.0226m/z	149.02	7.43	pos	Phthalic acid	HMDB0002107	Benzenoids	Benzene and substituted derivatives	Benzoic acids and derivatives	M+H-H2O	C8H6O4	43.5	27	-4.29	3.23	0	0	-0.26	0.84	2202.89	2638.16
6.66_525.2843n	526.29	6.66	pos	LysoPE(0:0/22:6(4Z,7Z,10Z,13Z,16Z,19Z))	HMDB0011496	Lipids and lipid-like molecules	Glycerophospholipids	Glycerophosphoethanolamines	M+H, M+Na, M+H-H2O	C27H44NO7P	43.3	21.3	-2.41	4.07	0.01	0.07	0.41	1.33	5149.63	3886.51
6.57_479.3031n	502.29	6.57	pos	LysoPE(0:0/18:1(11Z))	HMDB0011475	Lipids and lipid-like molecules	Glycerophospholipids	Glycerophosphoethanolamines	M+Na, 2M+K	C23H46NO7P	43.2	24.5	3.91	1.49	0.01	0.05	0.38	1.3	595.4	456.86
9.37_423.3465m/z	423.35	9.37	neg	23-methyl-5Z,9Z-tetracosadienoic acid	LMFA01020233	Lipids and lipid-like molecules	Fatty Acyls	Fatty Acids and Conjugates	M+FA-H	C25H46O2	43.1	39	-3.93	1.89	0	0	1	2.01	316.61	157.88
7.99_418.2928n	401.29	7.99	pos	Palmitoyl glucuronide	HMDB0010331	Lipids and lipid-like molecules	Fatty Acyls	Fatty acyl glycosides	M+H-H2O, M+NH4	C22H42O7	42.7	26.6	-0.57	1.5	0	0	1.07	2.09	237.65	113.49
4.65_540.2562n	558.29	4.65	pos	Tetrahydroaldosterone-3-glucuronide	HMDB0010357	Lipids and lipid-like molecules	Steroids and steroid derivatives	Steroidal glycosides	M+NH4, M+Na	C27H40O11	42.5	24.3	-1.63	1.66	0.02	0.1	-1.04	0.49	187.86	386.57
6.73_504.3079m/z	504.31	6.73	neg	PC(17:2(9Z,12Z)/0:0)	LMGP01050127	Lipids and lipid-like molecules	Glycerophospholipids	Glycerophosphocholines	M-H	C25H48NO7P	42.5	20.8	-3.37	1.95	0.01	0.09	0.16	1.12	2197.26	1961.66
6.22_476.2765m/z	476.28	6.22	pos	LysoPE(0:0/18:3(6Z,9Z,12Z))	HMDB0011478	Lipids and lipid-like molecules	Glycerophospholipids	Glycerophosphoethanolamines	M+H	C23H42NO7P	42.4	22.2	-1.39	1.67	0	0.02	1.2	2.3	302.42	131.47
13.84_780.5491m/z	780.55	13.84	pos	PC(16:0/18:2(9Z,12Z))	HMDB0007973	Lipids and lipid-like molecules	Glycerophospholipids	Glycerophosphocholines	M+Na	C42H80NO8P	42.3	27.6	-2.98	6.91	0	0	-0.52	0.7	5255.84	7512.2
7.03_504.3075m/z	504.31	7.03	pos	LysoPE(0:0/18:0)	HMDB0011129	Lipids and lipid-like molecules	Glycerophospholipids	Glycerophosphoethanolamines	M+Na	C23H48NO7P	42.1	19.2	2.95	1.6	0	0.02	0.69	1.61	410.13	254.57
7.29_311.1679m/z	311.17	7.29	neg	N-Undecylbenzenesulfonic acid	HMDB0032549	Benzenoids	Benzene and substituted derivatives	Benzenesulfonic acids and derivatives	M-H	C17H28O3S	42.1	21.7	-2.31	3.48	0	0.01	-0.54	0.69	1440.83	2094.9
6.49_640.3442m/z	640.34	6.49	pos	PKOHA-PG	LMGP20060010	Lipids and lipid-like molecules	Glycerophospholipids	Oxidized glycerophospholipids	M+NH4	C29H51O12P	42	29.5	-2.34	1.02	0	0.02	0.99	1.98	123.98	62.6
7.36_521.3466n	522.35	7.36	pos	PC(18:1(9E)/0:0)[U]	46689	Unclassified	Unclassified	Unclassified	M+H, M+Na, M+H-H2O	C26H52NO7P	42	14.7	-2.95	17.08	0.01	0.07	0.3	1.24	113237	91681.4
6.71_576.2020m/z	576.2	6.71	neg	Acrimarine J	HMDB0040386	Organoheterocyclic compounds	Quinolines and derivatives	Benzoquinolines	M-H2O-H	C35H33NO8	41.9	14.8	-1.26	2.24	0	0	0.94	1.92	433.99	226.47
6.80_424.3417m/z	424.34	6.8	pos	2-Hydroxy-3-methoxyestrone	HMDB0011195	Organic acids and derivatives	Hydroxy acids and derivatives	Beta hydroxy acids and derivatives	M+H-H2O	C25H47NO5	41.9	13.7	-1.1	1.87	0.04	0.18	0.34	1.27	2013.69	1590.53
7.75_581.3067m/z	581.31	7.75	pos	Oxamniquine	HMDB0015228	Organoheterocyclic compounds	Quinolines and derivatives	Nitroquinolines and derivatives	2M+Na	C14H21N3O3	41.8	15.6	1.53	1.25	0	0.01	1.41	2.66	145.82	54.81
8.27_325.1836m/z	325.18	8.27	neg	2-Dodecylbenzenesulfonic acid	HMDB0031031	Benzenoids	Benzene and substituted derivatives	Benzenesulfonic acids and derivatives	M-H	C18H30O3S	41.6	18.6	-2.23	3.55	0	0	-0.61	0.65	1186.44	1814.17
6.80_620.2949n	603.29	6.8	pos	PI(20:4(5Z,8Z,11Z,14Z)/0:0)	46748	Unclassified	Unclassified	Unclassified	M+H-H2O, M+H	C29H49O12P	41.5	18.7	-2.08	1.47	0.04	0.17	0.26	1.2	1212.02	1011
13.84_717.5686n	756.55	13.84	pos	PC(14:0/P-18:0)	HMDB0007896	Lipids and lipid-like molecules	Glycerophospholipids	Glycerophosphocholines	M+H, M+K, M+Na	C40H80NO7P	41.4	22.8	1.91	2.47	0	0.04	0.44	1.36	1306.18	960.62
13.85_769.5592n	792.58	13.85	pos	PE(16:1(9Z)/22:2(13Z,16Z))	HMDB0008975	Lipids and lipid-like molecules	Glycerophospholipids	Glycerophosphoethanolamines	M+H-H2O, M+Na	C43H80NO8P	41.4	16.2	-3.78	1.74	0.02	0.12	-0.24	0.85	1356.33	1598.04
4.37_315.1337m/z	315.13	4.37	pos	(S)-Annocherine A	HMDB0038723	Unclassified	Unclassified	Unclassified	M+NH4	C17H15NO4	41.4	8.78	-0.77	1.84	0.01	0.06	-0.48	0.72	503.74	701.25
9.38_491.3722m/z	491.37	9.38	neg	24-ethyl-5alpha-cholest-25-en-3alpha,12alpha,16alpha-triol	LMST01040188	Lipids and lipid-like molecules	Sterol Lipids	Sterols	M+FA-H	C29H50O3	41.4	30.5	-4.43	1.55	0	0	0.95	1.93	230.83	119.34
2.19_129.0555m/z	129.06	2.19	neg	Adipate semialdehyde	HMDB0012882	Lipids and lipid-like molecules	Fatty Acyls	Fatty acids and Conjugates	M-H	C6H10O3	41.3	8.61	-1.45	1.43	0.04	0.18	-0.15	0.9	1778.19	1979.71
3.57_810.5641m/z	810.56	3.57	neg	PC(18:3(9Z,12Z,15Z)/P-18:1(11Z))	HMDB0008227	Lipids and lipid-like molecules	Glycerophospholipids	Glycerophosphocholines	M+FA-H	C44H80NO7P	41.3	28.6	-1.72	1.63	0	0	-0.79	0.58	180.12	312.13
7.35_506.3234m/z	506.32	7.35	neg	PC(17:1(10Z)/0:0)	LMGP01050002	Lipids and lipid-like molecules	Glycerophospholipids	Glycerophosphocholines	M-H	C25H50NO7P	41.3	15.2	-3.67	1.94	0.02	0.11	0.26	1.2	1881.19	1569.68
6.89_528.3074m/z	528.31	6.89	pos	LysoPE(0:0/22:5(4Z,7Z,10Z,13Z,16Z))	HMDB0011494	Lipids and lipid-like molecules	Glycerophospholipids	Glycerophosphoethanolamines	M+H	C27H46NO7P	41.2	13.9	-2.08	1.17	0	0.04	0.63	1.55	255.78	165.33
9.43_411.3475m/z	411.35	9.43	neg	Nervonic acid	HMDB0002368	Lipids and lipid-like molecules	Fatty Acyls	Fatty acids and Conjugates	M+FA-H	C24H46O2	41.2	22	-1.27	1.45	0	0.02	0.95	1.93	242.16	125.5
6.39_447.2739m/z	447.27	6.39	neg	(+)-Scalarin	LMPR0105060001	Lipids and lipid-like molecules	Prenol lipids	Isoprenoids	M+FA-H	C25H38O4	41.1	11.8	-3.34	1.12	0.02	0.11	0.43	1.35	359.19	266.99
7.63_494.3236m/z	494.32	7.63	neg	LysoPC(16:0)	HMDB0010382	Lipids and lipid-like molecules	Glycerophospholipids	Glycerophosphocholines	M-H	C24H50NO7P	41.1	13.8	-3.34	1.17	0	0.04	0.37	1.29	385.44	298.81
8.62_339.2322m/z	339.23	8.62	neg	1,1'-[1,11-Undecanediylbis(oxy)]bisbenzene	HMDB0039762	Benzenoids	Phenol ethers	Unclassified	M-H	C23H32O2	41.1	10.7	-2.09	1.87	0.04	0.18	1.01	2.01	585.44	291.5
8.24_878.5886m/z	878.59	8.24	neg	LacCer(d18:1/14:0)	LMSP0501AB12	Lipids and lipid-like molecules	Sphingolipids	Neutral glycosphingolipids	M+FA-H	C44H83NO13	41	26.1	4.77	2.04	0.01	0.07	-0.75	0.6	433.71	728.31
8.89_511.3986m/z	511.4	8.89	neg	14-keto pentadecanoic acid	LMFA01060049	Lipids and lipid-like molecules	Fatty Acyls	Fatty Acids and Conjugates	2M-H	C15H28O3	40.9	10.7	-3.53	1.35	0.01	0.07	0.57	1.48	387.79	261.33
7.78_536.3698m/z	536.37	7.78	pos	PC(19:1(9Z)/0:0)	76572	Unclassified	Unclassified	Unclassified	M+H	C27H54NO7P	40.8	18	-2.34	1.06	0.01	0.07	0.47	1.39	293.14	211.2
6.80_596.2954n	579.29	6.8	pos	PI(18:2(9Z,12Z)/0:0)	LMGP06050010	Lipids and lipid-like molecules	Glycerophospholipids	Glycerophosphoinositols	M+H-H2O, M+H	C27H49O12P	40.7	23.9	-1.25	1.09	0.02	0.12	0.37	1.29	453.21	351.27
6.73_564.3294m/z	564.33	6.73	neg	PC(18:2(2E,4E)/0:0)	LMGP01050034	Lipids and lipid-like molecules	Glycerophospholipids	Glycerophosphocholines	M+FA-H	C26H50NO7P	40.6	6.72	-2.48	9.88	0	0.01	0.19	1.14	38374.9	33542.8
13.84_782.5651m/z	782.57	13.84	pos	PC(16:0/18:1(11Z))	HMDB0007971	Unclassified	Unclassified	Unclassified	M+Na	C42H82NO8P	40.5	15.4	-2.52	6.96	0.04	0.17	0.39	1.31	15247.6	11650.3
5.12_408.2509n	453.25	5.12	neg	15R-PGE2 methyl ester, 15-acetate	LMFA03010201	Lipids and lipid-like molecules	Fatty Acyls	Eicosanoids	M-H, M+FA-H	C23H36O6	40.5	6.29	-0.65	1.6	0.04	0.18	-1.19	0.44	185.45	423.48
7.03_502.2923m/z	502.29	7.03	neg	LysoPE(0:0/20:3(11Z,14Z,17Z))	HMDB0011484	Lipids and lipid-like molecules	Glycerophospholipids	Glycerophosphoethanolamines	M-H	C25H46NO7P	40.5	11.4	-3.24	1.41	0	0.02	0.69	1.61	306.1	190.26
5.72_417.2268m/z	417.23	5.72	neg	9'-Carboxy-gamma-tocotrienol	HMDB0012869	Lipids and lipid-like molecules	Prenol lipids	Monoterpenoids	M+FA-H	C23H32O4	40.4	10.6	-3.88	1.15	0	0.03	-1.73	0.3	44.33	146.92
7.40_511.2897m/z	511.29	7.4	neg	L-Oleandrosyl-oleandolide	LMPK04000033	Lipids and lipid-like molecules	Polyketides	Macrolides and lactone polyketides	M-H2O-H	C27H46O10	40.4	10.3	-3	1.13	0.03	0.13	0.61	1.53	349.37	228.95
6.48_857.6719m/z	857.67	6.48	neg	SM(d18:1/24:1(15Z))	HMDB0012107	Lipids and lipid-like molecules	Sphingolipids	Phosphosphingolipids	M+FA-H	C47H93N2O6P	40.3	15	-4.24	3.01	0	0.02	-0.43	0.74	1372.42	1853.81
0.84_90.0314n	89.02	0.84	neg	Glyceraldehyde	HMDB0001051	Organic oxygen compounds	Organooxygen compounds	Carbohydrates and carbohydrate Conjugates	M-H, M+FA-H	C3H6O3	39.9	4.87	-3.31	1.07	0.02	0.12	-0.22	0.86	501.57	586.15
9.06_552.4012m/z	552.4	9.06	pos	PAF C-18	43410	Unclassified	Unclassified	Unclassified	M+H	C28H58NO7P	39.9	11.3	-2.12	1.37	0.02	0.13	0.48	1.4	586.46	419.69
10.05_283.2641m/z	283.26	10.05	neg	8Z-Heptadecene	LMFA11000102	Lipids and lipid-like molecules	Fatty Acyls	Hydrocarbons	M+FA-H	C17H34	39.8	0	-0.64	2.39	0	0.04	0.49	1.4	1332.62	950.25
7.41_487.2902m/z	487.29	7.41	neg	Ascorbyl stearate	HMDB0038242	Lipids and lipid-like molecules	Fatty Acyls	Fatty acid esters	M+FA-H	C24H42O7	39.8	7.3	-2.45	2.02	0	0	1.06	2.08	341.83	164.03
8.00_878.5888m/z	878.59	8	neg	PE(22:6(4Z,7Z,10Z,13Z,16Z,19Z)/21:0)	LMGP02011156	Lipids and lipid-like molecules	Glycerophospholipids	Glycerophosphoethanolamines	M+FA-H	C48H84NO8P	39.8	21.9	-3.4	2.37	0.01	0.08	-0.48	0.72	1047.85	1461.4
2.78_565.2243m/z	565.22	2.78	pos	Girinimbine	HMDB0030241	Organoheterocyclic compounds	Indoles and derivatives	Carbazoles	2M+K	C18H17NO	39.7	2.89	-1.62	1.06	0.01	0.09	1.06	2.09	162.24	77.69
6.30_318.0976m/z	318.1	6.3	pos	3,5-Dihydroxy-6,7-methylenedioxyflavanone	HMDB0033321	Phenylpropanoids and polyketides	Flavonoids	Flavans	M+NH4	C16H12O6	39.6	4.56	1.15	1.11	0.01	0.05	1.62	3.08	111.68	36.28
4.17_346.1530n	347.16	4.17	pos	coumarin-SAHA	64949	Unclassified	Unclassified	Unclassified	M+H-H2O, M+H	C18H22N2O5	39.5	1.09	0.38	1.33	0	0.01	-0.67	0.63	147.46	234.31
8.61_538.3861m/z	538.39	8.61	pos	PC(19:0/0:0)	LMGP01050041	Lipids and lipid-like molecules	Glycerophospholipids	Glycerophosphocholines	M+H	C27H56NO7P	39.1	3.13	-1.17	1.48	0.04	0.17	0.4	1.32	810.15	615.12
8.64_536.5027m/z	536.5	8.64	pos	N-[(4E,8E)-1,3-dihydroxyoctadeca-4,8-dien-2-yl]hexadecanamide	HMDB0035480	Lipids and lipid-like molecules	Sphingolipids	Ceramides	M+H	C34H65NO3	39	2.93	-1.85	1.59	0.04	0.17	0.28	1.22	1402.87	1153.72
0.56_236.0713m/z	236.07	0.56	pos	2-(4-Methyl-5-thiazolyl)ethyl butanoate	HMDB0032418	Organoheterocyclic compounds	Azoles	Thiazoles	M+Na	C10H15NO2S	38.9	0.486	-1.4	2.29	0	0	-0.26	0.83	1160.38	1391.5
7.11_895.6743m/z	895.67	7.11	pos	N-Stearoyl tyrosine	HMDB0062343	Organic acids and derivatives	Carboxylic acids and derivatives	Amino acids, peptides, and analogues	2M+H	C27H45NO4	38.9	0	-2.97	1.36	0	0	1.28	2.42	171.49	70.84
7.41_449.2891m/z	449.29	7.41	pos	Methyl jasmonate	HMDB0036583	Lipids and lipid-like molecules	Fatty Acyls	Lineolic acids and derivatives	2M+H	C13H20O3	38.9	1.64	-1.49	1.26	0	0.04	1.02	2.03	215.03	105.72
13.85_731.6033m/z	731.6	13.85	pos	N-Stearoyl-D-sphingomyelin	438	Unclassified	Unclassified	Unclassified	M+H	C41H83N2O6P	38.8	13.5	-3.93	2.6	0	0.01	-0.43	0.74	1020.41	1375.29
9.43_449.3618m/z	449.36	9.43	neg	3a,7a-Dihydroxy-5b-cholestane	HMDB0006893	Lipids and lipid-like molecules	Steroids and steroid derivatives	Cholestane steroids	M+FA-H	C27H48O2	38.8	12.4	-4.59	2.59	0	0.01	0.6	1.52	1001.64	659.69
9.72_593.4775m/z	593.48	9.72	neg	Cohibin A	HMDB0031168	Lipids and lipid-like molecules	Fatty Acyls	Fatty alcohols	M+FA-H	C35H64O4	38.8	7.93	-2.09	3.05	0	0	1.03	2.04	770.65	378.59
8.37_447.2505m/z	447.25	8.37	neg	(4-Hydroxybenzoyl)choline	HMDB0029559	Organooxygen compounds	Carbonyl compounds	Ketones	2M-H	C12H18NO3+	38.7	0	0.91	3.05	0	0.02	0.68	1.6	1443.48	901.54
2.78_472.2387m/z	472.24	2.78	pos	Butyl (S)-3-hydroxybutyrate [arabinosyl-(1->6)-glucoside]	HMDB0039214	Lipids and lipid-like molecules	Fatty Acyls	Fatty acyl glycosides	M+NH4	C19H34O12	38.6	10.8	-0.39	1.22	0.02	0.11	-0.39	0.76	364.09	476.61
7.14_557.3194m/z	557.32	7.14	neg	E-10-Hydroxynortriptyline	HMDB0013889	Benzenoids	Dibenzocycloheptenes	Unclassified	2M-H	C19H21NO	38.6	0	3.63	1.19	0.04	0.18	-0.12	0.92	1328.58	1443.9
9.43_539.4304m/z	539.43	9.43	neg	Ambrettolic acid	LMFA01050106	Lipids and lipid-like molecules	Fatty Acyls	Fatty Acids and Conjugates	2M-H	C16H30O3	38.6	5.6	-2.46	4.13	0	0.02	0.97	1.96	2165.78	1105.69
9.43_589.4455m/z	589.45	9.43	neg	31-hydroxy-32,35-anhydrobacteriohopanetetrol	LMPR04000027	Lipids and lipid-like molecules	Prenol lipids	Hopanoids	M+FA-H	C35H60O4	38.6	19.3	-3.51	1.9	0	0	1.39	2.62	254.42	97.09
7.75_208.1249n	417.24	7.75	pos	2,4-Diphenyl-1-butene	HMDB0032563	Phenylpropanoids and polyketides	Linear 1,3-diarylpropanoids	Unclassified	M+NH4, 2M+H	C16H16	38.4	4.41	-1.37	1.81	0	0	1.04	2.06	296	143.64
9.44_474.3696n	473.36	9.44	neg	20,24-Epoxy-25,26-dihydroxydammaran-3-one	HMDB0039692	Lipids and lipid-like molecules	Prenol lipids	Terpene glycosides	M-H, M+FA-H	C30H50O4	38.4	11.2	-2.69	3.99	0	0	0.91	1.88	1465.92	781.33
3.68_856.6046m/z	856.6	3.68	neg	PE(19:1(9Z)/22:2(13Z,16Z))	LMGP02010821	Lipids and lipid-like molecules	Glycerophospholipids	Glycerophosphoethanolamines	M+FA-H	C46H86NO8P	38.3	20.8	-3.33	1.82	0.05	0.19	0.23	1.17	2367.28	2018.53
6.74_479.3387n	997.62	6.74	pos	PC(O-16:1(11Z)/0:0)	LMGP01060028	Lipids and lipid-like molecules	Glycerophospholipids	Glycerophosphocholines	M+Na, 2M+K	C24H50NO6P	38.3	0.934	2.36	2.3	0	0.03	0.54	1.45	927.53	637.77
8.33_547.1751m/z	547.18	8.33	neg	Charine	HMDB0039877	Organic oxygen compounds	Organooxygen compounds	Carbohydrates and carbohydrate Conjugates	2M-H	C9H14N4O6	38.3	0	-0.47	1.58	0	0	1.62	3.08	163.27	52.96
1.69_202.0439m/z	202.04	1.69	pos	Thiabendazole	2823	Organoheterocyclic compounds	Benzimidazoles	Unclassified	M+H	C10H7N3S	38.2	0.42	2.78	3.73	0	0	-0.2	0.87	4912.54	5633.28
13.85_765.5303n	766.57	13.85	pos	PE(P-18:1(9Z)/20:4(5Z,8Z,10E,14Z)(12OH[S]))	LMGP20020006	Lipids and lipid-like molecules	Glycerophospholipids	Oxidized glycerophospholipids	M+H-H2O, M+H	C43H76NO8P	38.2	7.91	-0.78	1.73	0.01	0.09	-0.3	0.81	1036.3	1277.61
3.40_383.1521m/z	383.15	3.4	neg	3b,16a-Dihydroxyandrostenone sulfate	HMDB0000386	Lipids and lipid-like molecules	Steroids and steroid derivatives	Sulfated steroids	M-H	C19H28O6S	38.2	0.527	-3.43	2.05	0.01	0.06	-1.54	0.34	140.64	409.29
8.23_770.5691m/z	770.57	8.23	neg	1-tetradecanyl-2-(8-[3]-ladderane-octanyl)-sn-glycerophosphocholine	LMGP01040094	Lipids and lipid-like molecules	Glycerophospholipids	Glycerophosphocholines	M+FA-H	C42H80NO6P	38.2	4.69	-1.96	2.25	0.01	0.08	0.5	1.41	1295.39	918.57
7.06_662.2752m/z	662.28	7.06	neg	Neoacrimarine A	HMDB0040384	Organoheterocyclic compounds	Quinolines and derivatives	Benzoquinolines	M-H2O-H	C40H43NO9	38.1	0	-1.12	1.19	0	0.01	0.68	1.6	200.93	125.44
8.46_650.4383m/z	650.44	8.46	pos	PON-PC	LMGP20010008	Lipids and lipid-like molecules	Glycerophospholipids	Oxidized glycerophospholipids	M+H	C33H64NO9P	38.1	2.47	-1.36	2.29	0	0.04	0.58	1.5	1022.68	682.49
2.45_374.1873n	749.38	2.45	pos	SpinochalCone B	51821	Unclassified	Unclassified	Unclassified	2M+H, 2M+Na, M+H	C25H26O3	38	3.08	-2.45	3.03	0.01	0.06	0.5	1.41	2444.47	1733.37
6.70_979.5774m/z	979.58	6.7	pos	25-Acetylvulgaroside	HMDB0041365	Lipids and lipid-like molecules	Prenol lipids	Sesterterpenoids	2M+Na	C27H42O7	38	3.78	2.18	2.65	0	0	1	1.99	672.2	337.03
13.84_122.0958m/z	122.1	13.84	pos	9-Azabicyclo[3.3.1]nonan-3-one	HMDB0029613	Organoheterocyclic compounds	Piperidines	Piperidinones	M+H-H2O	C8H13NO	37.8	0	-4.37	1.22	0	0	-0.67	0.63	91.76	146.19
7.28_571.2872m/z	571.29	7.28	neg	1-Palmitoylglycerophosphoinositol	HMDB0061695	Lipids and lipid-like molecules	Glycerophospholipids	Glycerophosphoinositols	M-H	C25H49O12P	37.7	4.79	-2.9	1.34	0	0	0.6	1.52	257.83	169.76
7.34_507.2714m/z	507.27	7.34	neg	1-(11Z,14Z-eicosadienoyl)-glycero-3-phosphate	HMDB0062303	Lipids and lipid-like molecules	Glycerophospholipids	Glycerophosphates	M+FA-H	C23H43O7P	37.6	6.59	-3.19	1.13	0	0	1.46	2.75	85.14	30.93
3.62_734.5683m/z	734.57	3.62	pos	1,2-dipalmitoyl-sn-glycero-3-PC	45182	Unclassified	Unclassified	Unclassified	M+H	C40H80NO8P	37.5	1.56	-1.55	1.91	0.03	0.16	-0.27	0.83	1446.11	1748.43
6.63_265.1476m/z	265.15	6.63	neg	6,7-Dihydro-4-(hydroxymethyl)-2-(p-hydroxyphenethyl)-7-methyl-5H-2-pyrindinium	HMDB0033483	Benzenoids	Phenols	1-hydroxy-2-unsubstituted benzenoids	M-H2O-H	C18H22NO2+	37.5	0	1.38	1.62	0.03	0.14	-0.74	0.6	318.84	530.81
9.44_591.4615m/z	591.46	9.44	neg	Mayolene-17	LMFA07010689	Lipids and lipid-like molecules	Fatty Acyls	Fatty esters	M+FA-H	C35H62O4	37.4	14.1	-2.84	5.12	0	0.02	0.93	1.9	3431.09	1804.95
6.71_995.6100m/z	995.61	6.71	neg	PIM1(17:0/18:0)	LMGP15010012	Lipids and lipid-like molecules	Glycerophospholipids	Glycerophosphoinositolglycans	M-H2O-H	C50H95O18P	37.2	0	2.22	2.69	0	0	0.72	1.65	845.43	512.97
6.69_977.5637m/z	977.56	6.69	neg	PIM1(18:2(9Z,12Z)/16:0)	LMGP15010027	Lipids and lipid-like molecules	Glycerophospholipids	Glycerophosphoinositolglycans	M-H2O-H	C49H89O18P	37.1	0.526	2.86	1.69	0	0.01	0.87	1.83	321.8	175.88
9.28_573.4512m/z	573.45	9.28	neg	32,35-anhydrobacteriohopaneterol	LMPR04000022	Lipids and lipid-like molecules	Prenol lipids	Hopanoids	M+FA-H	C35H60O3	36.9	3.11	-2.31	3.08	0	0	1.09	2.13	814.8	382.14
2.46_809.3327m/z	809.33	2.46	pos	Mammeigin	HMDB0030785	Phenylpropanoids and polyketides	Neoflavonoids	Prenylated neoflavonoids	2M+H	C25H24O5	36.7	0	0.79	1.75	0	0.04	0.57	1.48	593.91	400.53
9.43_517.3884m/z	517.39	9.43	neg	Theonellasterol D	LMST01040182	Lipids and lipid-like molecules	Sterol Lipids	Sterols	M+FA-H	C31H52O3	36.7	6.17	-3.11	2.74	0	0	0.85	1.81	736.81	407.79
3.71_829.6421m/z	829.64	3.71	neg	SM(d18:1/22:1(13Z))	HMDB0012104	Lipids and lipid-like molecules	Sphingolipids	Phosphosphingolipids	M+FA-H	C45H89N2O6P	36.3	24.8	-2.49	1.6	0.02	0.13	-0.44	0.74	588.96	799.64
8.26_874.4860m/z	874.49	8.26	neg	PS(18:3(9Z,12Z,15Z)/22:6(4Z,7Z,10Z,13Z,16Z,19Z))	HMDB0012417	Lipids and lipid-like molecules	Glycerophospholipids	Glycerophosphoserines	M+FA-H	C46H72NO10P	36.3	5.57	-1.88	2.12	0.01	0.07	0.51	1.43	1199.62	840.7
13.84_870.5500m/z	870.55	13.84	neg	PS(17:0/22:4(7Z,10Z,13Z,16Z))	LMGP03010247	Lipids and lipid-like molecules	Glycerophospholipids	Glycerophosphoserines	M+FA-H	C45H80NO10P	36.1	3.5	-0.21	1.04	0.02	0.11	-0.16	0.89	696.3	780.2
13.84_719.5821n	758.57	13.84	pos	PC(O-16:0/16:0)	LMGP01020029	Lipids and lipid-like molecules	Glycerophospholipids	Glycerophosphocholines	M+Na, M+K, M+H	C40H82NO7P	35.8	2.99	-1.1	10.66	0.03	0.15	-0.16	0.9	85899.5	95891.2
13.84_500.2767m/z	500.28	13.84	neg	Vignatic acid B	HMDB0033617	Organic acids and derivatives	Carboxylic acids and derivatives	Amino acids, peptides, and analogues	M-H2O-H	C27H41N3O7	35.7	0	0.16	1.19	0	0	-0.58	0.67	123.28	184.01
13.84_683.5220n	701.56	13.84	pos	1-tetradecanyl-2-(8-[3]-ladderane-octanyl)-sn-glycerophosphoethanolamine	LMGP02040015	Lipids and lipid-like molecules	Glycerophospholipids	Glycerophosphoethanolamines	M+NH4, M+Na	C39H74NO6P	35.4	0.157	-4.93	1.48	0.05	0.19	0.31	1.24	911.08	732.52
9.38_609.4714m/z	609.47	9.38	neg	Annotemoyin 1	HMDB0031390	Lipids and lipid-like molecules	Fatty Acyls	Fatty alcohols	M+FA-H	C35H64O5	34.9	11.7	-3.91	1.8	0	0	1.72	3.3	188.12	57.07
6.15_875.4941m/z	875.49	6.15	neg	Chlorophyll d	HMDB0037256	Organoheterocyclic compounds	Tetrapyrroles and derivatives	Chlorins	M-H2O-H	C54H70MgN4O6	34.5	0	-2.92	1.05	0	0.02	0.56	1.47	207.41	140.7
7.27_742.5721m/z	742.57	7.27	pos	PC(O-14:0/18:0)	LMGP01020015	Lipids and lipid-like molecules	Glycerophospholipids	Glycerophosphocholines	M+Na	C40H82NO7P	34.5	0.0111	-0.03	1.06	0.02	0.1	-0.4	0.76	296.66	392.8
7.73_537.1654m/z	537.17	7.73	pos	1,4-beta-D-Glucan	HMDB0006944	Organic oxygen compounds	Organooxygen compounds	Carbohydrates and carbohydrate Conjugates	M+H	C18H32O18	34.2	0	-1.47	1.58	0	0.01	-0.36	0.78	429.18	550.52
7.11_949.6242m/z	949.62	7.11	pos	Undecaprenyl diphosphate	HMDB0001469	Lipids and lipid-like molecules	Prenol lipids	Polyprenols	M+Na	C55H92O7P2	33.9	0	3.45	1.45	0	0.04	0.69	1.62	314.94	194.66
4.62_979.7136m/z	979.71	4.62	pos	Momoridcin	HMDB0030512	Lipids and lipid-like molecules	Prenol lipids	Triterpenoids	2M+K	C31H50O3	33.8	0	-1.68	1.95	0.03	0.14	0.31	1.24	1473.87	1185.08
4.62_997.6083m/z	997.61	4.62	pos	Cucurbitacin S	LMST01010116	Lipids and lipid-like molecules	Sterol Lipids	Sterols	2M+H	C30H42O6	33.5	1.49	4.79	1.26	0	0.01	0.58	1.49	254.49	170.28
4.54_532.1025m/z	532.1	4.54	neg	Indomethacin acyl glucuronide	HMDB0060922	Organoheterocyclic compounds	Indoles and derivatives	Benzoylindoles	M-H	C25H24ClNO10	33.4	17.3	1.78	1.43	0.01	0.08	-1.02	0.49	161.43	327.46
4.63_881.7420m/z	881.74	4.63	pos	4,4-Dimethyl-14a-formyl-5a-cholesta-8,24-dien-3b-ol	HMDB0001421	Lipids and lipid-like molecules	Prenol lipids	Triterpenoids	2M+H	C30H48O2	33.3	0	4.41	1.17	0	0.02	0.54	1.45	231.1	159.02
7.32_478.2925m/z	478.29	7.32	neg	LysoPE(18:1(11Z)/0:0)	HMDB0011505	Lipids and lipid-like molecules	Glycerophospholipids	Glycerophosphoethanolamines	M-H	C23H46NO7P	32.6	21.7	-3.04	4.88	0.01	0.07	0.32	1.25	8140.23	6513.94
4.05_829.5663m/z	829.57	4.05	pos	PS(18:0/20:4(8Z,11Z,14Z,17Z))	HMDB0010165	Lipids and lipid-like molecules	Glycerophospholipids	Glycerophosphoserines	M+NH4	C44H78NO10P	31.1	0	-4.76	1.21	0.03	0.13	0.38	1.3	393.38	302.77
4.06_829.6918m/z	829.69	4.06	pos	18:0-Glc-Campesterol	LMST01031128	Lipids and lipid-like molecules	Sterol Lipids	Sterols	M+H	C52H92O7	31.1	0.0374	0.25	1.25	0.04	0.17	0.3	1.23	541.13	438.42
0.82_358.0378n	357.03	0.82	neg	4-hydroxytriazolam	HMDB0061052	Organoheterocyclic compounds	Benzodiazepines	1,4-benzodiazepines	M-H, 2M-H, M+FA-H	C17H12Cl2N4O	30.4	0.782	-2.88	1.44	0.02	0.12	-0.16	0.9	1450.44	1616.67
